# Supplementary material for: Racemic and enantiomerically pure phenyl α-nitronyl nitroxide radicals: influence of chirality on solution and solid state propertiesElectronic supplementary information (ESI) available: figures showing alternative views of the crystal structures and the shortest distances between SOMOs in the crystals. See http://www.rsc.org/suppdata/jm/b1/b106239p/
Source: Royal Society of Chemistry journal article supplement (doi:10.1039/b106239p), 2002-01-15

*SUPPLEMENTARY INFORMATION for:*

Racemic and enantiomerically pure phenyl  $\alpha$ -nitronyl nitroxide radicals: Influence of chirality on solution and solid state properties

---

**Maria Minguet,<sup>a</sup> David B. Amabilino,<sup>a\*</sup> José Vidal-Gancedo,<sup>a</sup> Klaus Wurst<sup>b</sup> and Jaume Veciana<sup>a\*</sup>**

<sup>a</sup> *Institut de Ciència de Materials de Barcelona (CSIC), Campus Universitari, 08193 Bellaterra, Catalonia, Spain. E-mail [vecianaj@icmab.es](mailto:vecianaj@icmab.es), [amabilino@icmab.es](mailto:amabilino@icmab.es)*

<sup>b</sup> *Institut für Allgemeine Anorganische und Theoretische Chemie, Universität Innsbruck, A-6020, Innrain 52a, Austria*

---

**Figure S1:** The antiparallel-stacked hydrogen bonded chains formed in the crystal structure of (*R*)-4LNN.

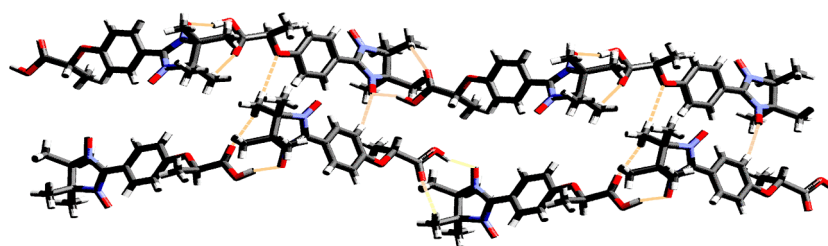

**Figure S2:** View of the stacks formed by the dimers of (*RS*)-4LNN in its crystals.

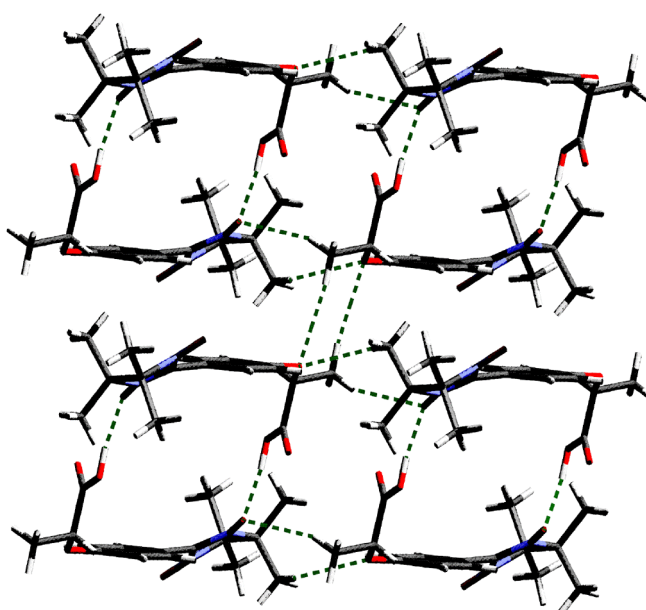

**Figure S3:** Views of the closest distances between SOMO's in the crystals of (*RS*)-4MLNN.

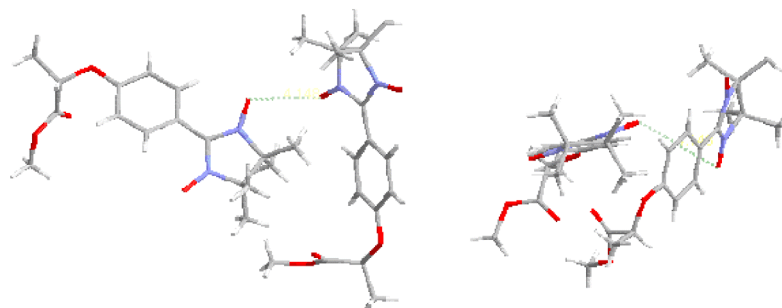

**Figure S4:** Views of the closest distances between SOMO's in the crystals of *(R)*-4LNN.

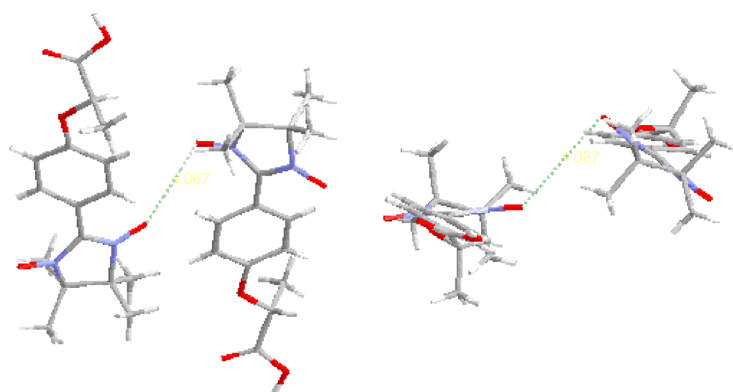

**Figure S5:** Views of the closest distances between SOMO's in the crystals of *(RS)*-4LNN.

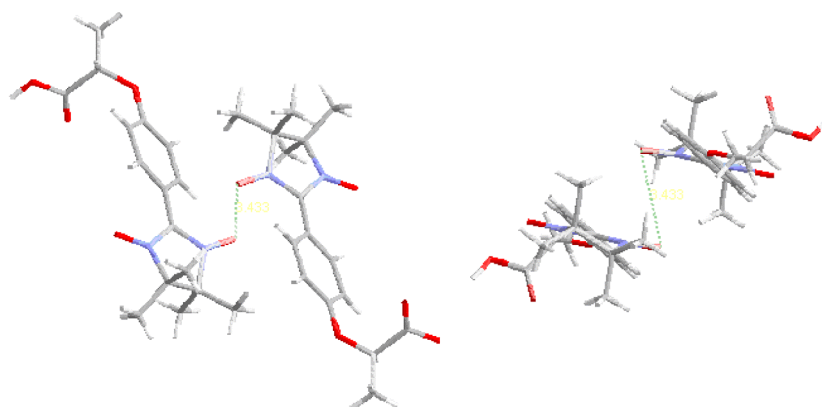

Supplement: b106239p.pdf [file b106239p.pdf]
